# Supplementary material for: A versatile macro-initiator with dual functional anchoring groups for surface-initiated atom transfer radical polymerization on various substrates
Source: Royal Society of Chemistry journal article supplement (doi:10.1039/c2py20148h), 2012-01-01
Supplement: c2py20148h.pdf [file c2py20148h.pdf]

## Supporting Information

### A versatile macro-initiator with dual functional anchoring groups for surface-initiated atom transfer radical polymerization on various substrates

Qiangbing Wei,<sup>a,b</sup> Xiaolong Wang <sup>\*a</sup> and Feng Zhou <sup>\*a</sup>

<sup>a</sup> State Key Laboratory of Solid Lubrication, Lanzhou Institute of Chemical Physics, Chinese Academy of Sciences, Lanzhou 730000, P. R. China. Fax: +86-931-4968163; Tel: +86-931-4968466; E-mail: wangxl@lzb.ac.cn, zhouf@lzb.ac.cn

<sup>b</sup> Graduate School of Chinese Academy of Sciences, Beijing 100039, P. R. China

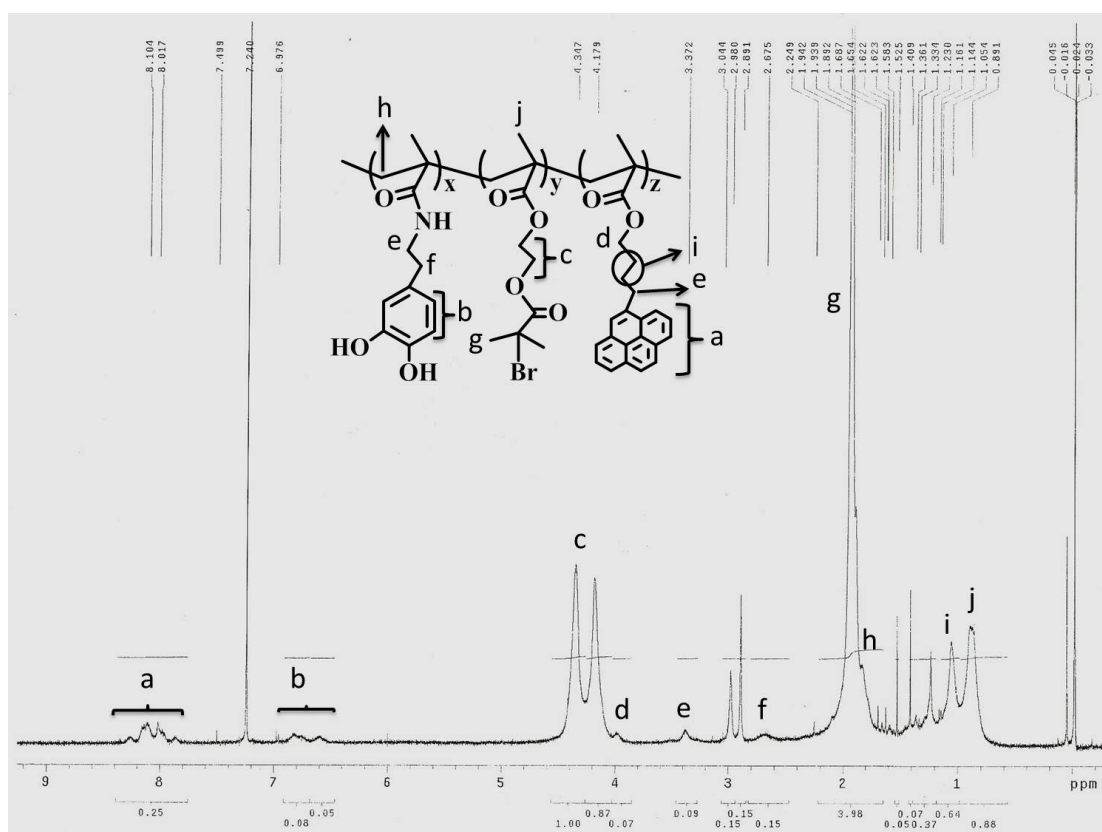

Fig. S1 <sup>1</sup>H-NMR spectrum of copolymer poly(DOPAMA-PBMA-BIEM).

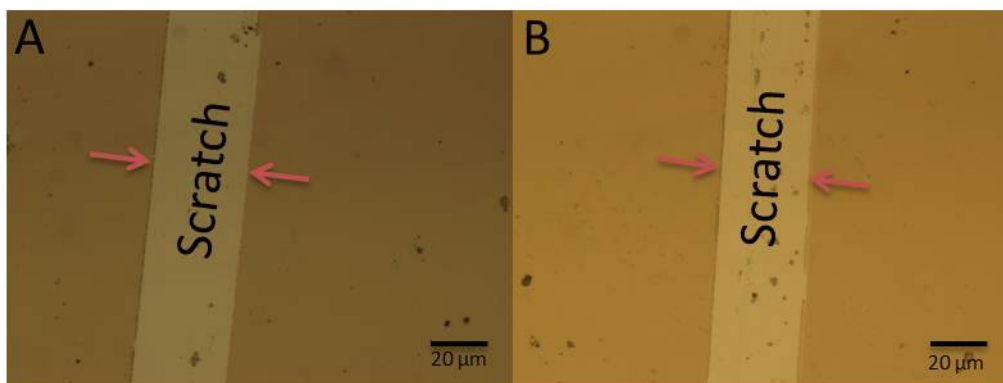

**Fig. S2** Optical microscope images of POEGMA-OH film with a scratch on Ti substrate. A: POEGMA-OH modified Ti substrate; B: after soaked in 0.1 M NaOH for 1 h and then ultrasonicated for 1 h in turn with two cycles.

**Table S1** The thickness of dry POEGMA-OH brushes modified Ti substrates for 90 min.

| Samples        | Ti-POEGMA-OH <sup>a</sup> | Ti-POEGMA-OH <sup>b</sup> | Ti-POEGMA-OH <sup>c</sup> |
|----------------|---------------------------|---------------------------|---------------------------|
| Thickness (nm) | $35.0 \pm 0.28$           | $33.2 \pm 0.27$           | $34.7 \pm 0.33$           |

<sup>a</sup> prepared from fresh macro-initiator solution; <sup>b</sup> prepared from macro-initiator solution stored for one month; <sup>c</sup> the POEGMA-OH film was soaked in 0.1 M NaOH for 1 h and then ultrasonicated in distilled water for 1 h in turn with two cycles.

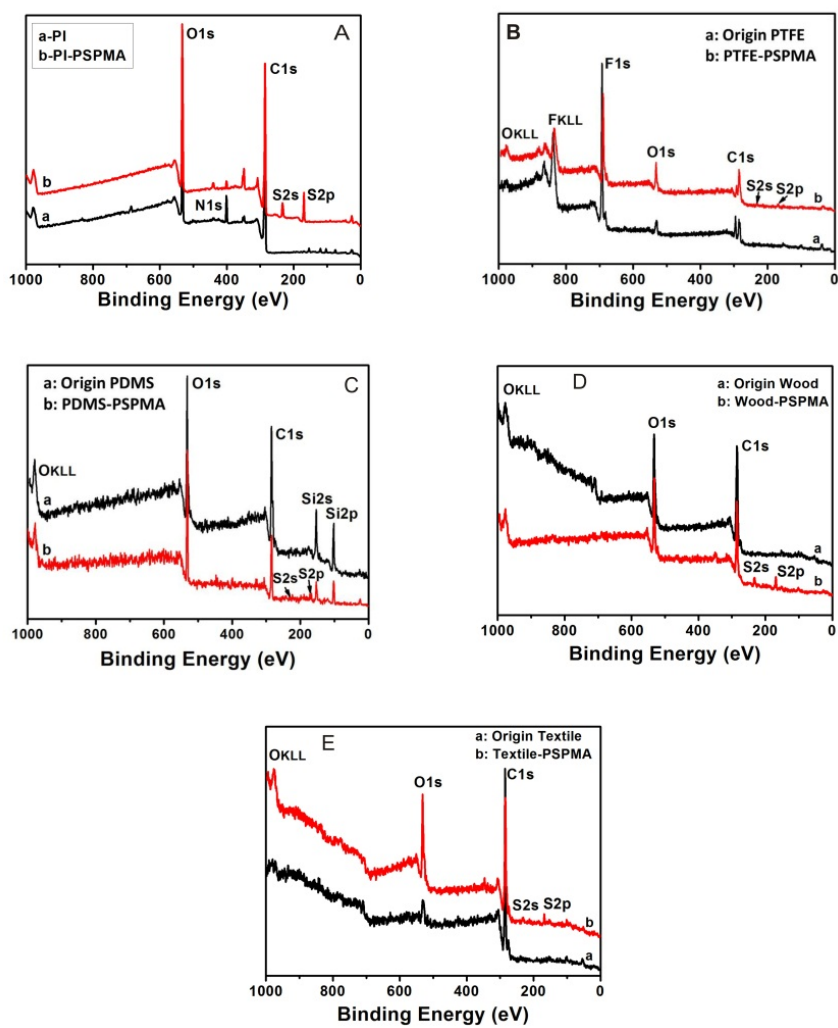

**Fig. S3** XPS survey spectra corresponding to the region spectra of Fig. 7. A: PI; B: PTFE; C: PDMS; D: Wood; E: Textile.
